# Supplementary material for: Crystal Structure of a Classical MHC Class I Molecule in Dogs; Comparison of DLA-88*0 and DLA-88*5 Category Molecules
Source: MDPI journal article supplement (doi:10.3390/cells12071097), 2023-04-06

**Figure S1. Comparison of the folding of the main chain of peptide ligand RTI9 in pDLA-88\*001:04 with that of peptides in other pMHC-I complexes**

The present study determined the structure of RTI9/DLA-88\*001:04/ $\beta$ 2m (PDB accession 7CJQ). In (A) the binding of the RTI9 peptide (RTISYTYPF) in the PBG of this structure is shown from above. In (B), superimposition of various pMHC-I structures shows that the RTI9 peptide main chain (magenta) forms an “M” structure, similar but not identical to the peptide folding in several other pMHC-I structures (codes before the commas are PDB accession numbers): 3QQ3, swine Sla-I 0401; 1VGK, mouse H-2kd; 3OXS, HLA-A\*02:07; 3PWU, cattle Bola-A11; 3RWC, rhesus macaque Mamu-B17-Iw9; 5Y91, grass carp UAA106; 5F1I, dog DLA-88\*508:01. The peptide ligands in (B) are shown from the side in ribbon format.

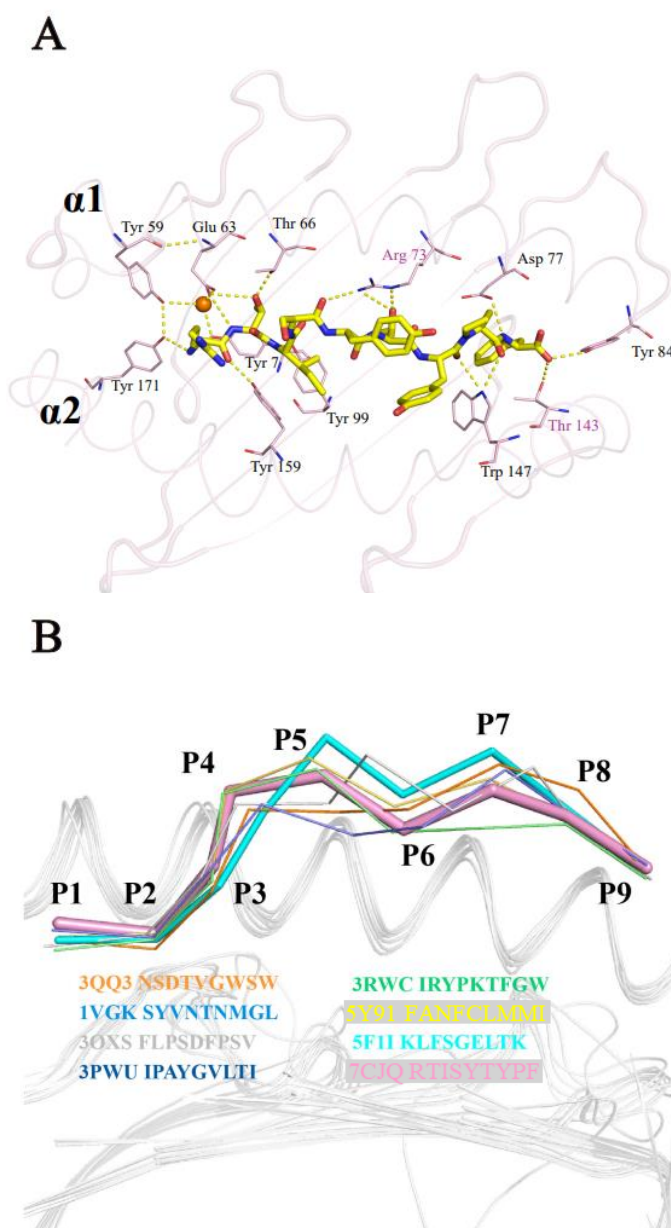

Supplement: s1 [file s1]
