# Supplementary material for: Crystal Structure of a Classical MHC Class I Molecule in Dogs; Comparison of DLA-88*0 and DLA-88*5 Category Molecules
Source: MDPI journal article supplement (doi:10.3390/cells12071097), 2023-04-06
Supplement: s1 [file s1]

**Table S1. Predicted peptides and their binding to DLA-88\*001:04/β2m evaluated by *in vitro* refolding**

| Derived protein <sup>a</sup> | name  | Sequence  | Stability <sup>b</sup> |
|------------------------------|-------|-----------|------------------------|
| Rabies-virus-glycoprotein    | MTT9  | MTTKSVSFR | ++                     |
|                              | VSF9  | VSFRRLSHL | ++                     |
| H5N1-H                       | YNA9  | YNAELLVLM | ++                     |
| H7N9-NA                      | DGA9  | DGAKIEYFL | --                     |
| H7N9-H                       | VAM9  | VAMENQHTI | ++                     |
| Canine-self                  | KLF9  | KLFSGELTK | ++                     |
|                              | CDV-H | VVL9      | VVLPTQNFR              |
|                              | ITN9  | ITNHRGFLK | ++                     |
|                              | TSV9  | TSVGRFFPL | ++                     |
|                              | RTI9  | RTISYTYPF | ++                     |
|                              | TSV9  | TSVGRVFPL | ++                     |
|                              | RVF9  | RVFEIGFIK | --                     |
| CDV-N                        | FSA9  | FSAGSYPLL | ++                     |
|                              | YPA9  | YPALGLHEF | ++                     |
|                              | EAG9  | EAGLASFIL | +-                     |
| CPV-VP1                      | PSN9  | PSNIGMKI  | +-                     |
|                              | TNP9  | TNPSDAAAK | --                     |
| CPV-NS1                      | MSG9  | MSGNQYTEE | --                     |

<sup>a</sup>H5N1 and H7N9 are influenza virus subtypes; CDV, canine distemper virus; CPV, canine parvovirus; H, hemagglutinin; NA, neuraminidase; N, nucleocapsid; VP1 is a capsid protein; NS1, nonstructural protein 1

<sup>b</sup>++, peptide binds strongly and can tolerate anion-exchange chromatography.

+-, peptide binds DLA-88\*001:04 but cannot tolerate anion-exchange chromatography.

--, peptide does not bind DLA-88\*001:04.
